# Supplementary material for: Harnessing the neutral Ca(NO3)2 electrolyte in CaMnO3 perovskite systems for calcium-ion supercapacitors
Source: Royal Society of Chemistry journal article supplement (doi:10.1039/d6ra01178k), 2026-03-31
Supplement: d6ra01178k1.pdf [file d6ra01178k1.pdf]

## Supplementary Information

### Harnessing Neutral $\text{Ca}(\text{NO}_3)_2$ Electrolyte in $\text{CaMnO}_3$ Perovskite Systems for Calcium-ion Supercapacitors

Abhirami Sukumaran and Helen Annal Therese\*

Futuristic Energy Storage Technology Lab, Department of Chemistry,  
SRM Institute of Science and Technology, Kattankulathur, Chengalpattu Dt, Tamil Nadu,  
603203, India

\*Corresponding author; E-mail [helena@srmist.edu.in](mailto:helena@srmist.edu.in)

**Table S1:** Specific capacitance values of  $\text{CaMnO}_3$  electrode material calculated from the CV curves at -0.4V - 1.5V potential window.

| Scan Rate ( $\text{mV s}^{-1}$ ) | Capacitance ( $\text{F g}^{-1}$ ) |
|----------------------------------|-----------------------------------|
| 5                                | 208.42                            |
| 10                               | 158.95                            |
| 25                               | 98.65                             |
| 50                               | 70.29                             |
| 75                               | 56.21                             |
| 100                              | 44.47                             |

**Table S2:** Specific capacitance values of  $\text{CaMnO}_3$  calculated from GCD curves at potential window of -0.4V - 1.5 V.

| Specific Current ( $\text{A g}^{-1}$ ) | Capacitance ( $\text{F g}^{-1}$ ) |
|----------------------------------------|-----------------------------------|
| 0.5                                    | 258.60                            |
| 1                                      | 244.00                            |
| 2                                      | 167.00                            |
| 3                                      | 146.00                            |
| 5                                      | 100.00                            |
| 8                                      | 74.00                             |
| 10                                     | 54.47                             |
| 12                                     | 42.90                             |

**Table S3:** EDAX analysis showing atomic % of Ca, Mn, O in CaMnO<sub>3</sub>.

| Element | Atom % |
|---------|--------|
| O       | 47.83  |
| Ca      | 26.48  |
| Mn      | 25.69  |
| Total   | 100.00 |

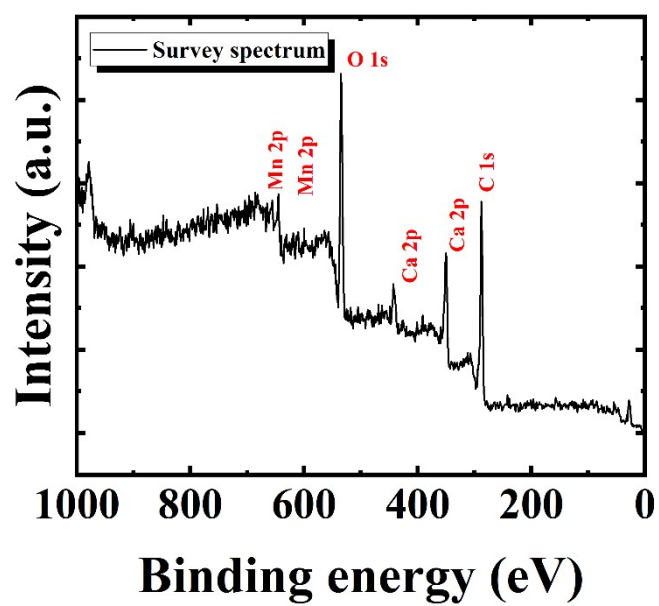

**Figure S1 :** Survey spectrum from XPS of CaMnO<sub>3</sub>.

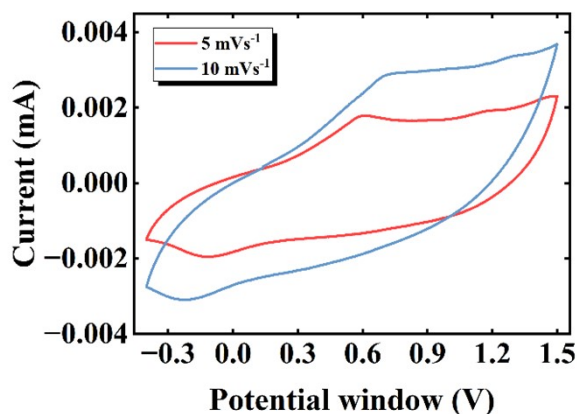

**Figure S2:** Cyclic voltammogram of  $\text{CaMnO}_3$  in  $0.5\text{M Ca}(\text{NO}_3)_2$  in the potential window of  $-0.4 - 1.5\text{ V}$  with anodic and cathodic peaks at  $0.58$  and  $-0.12\text{ V}$  respectively.

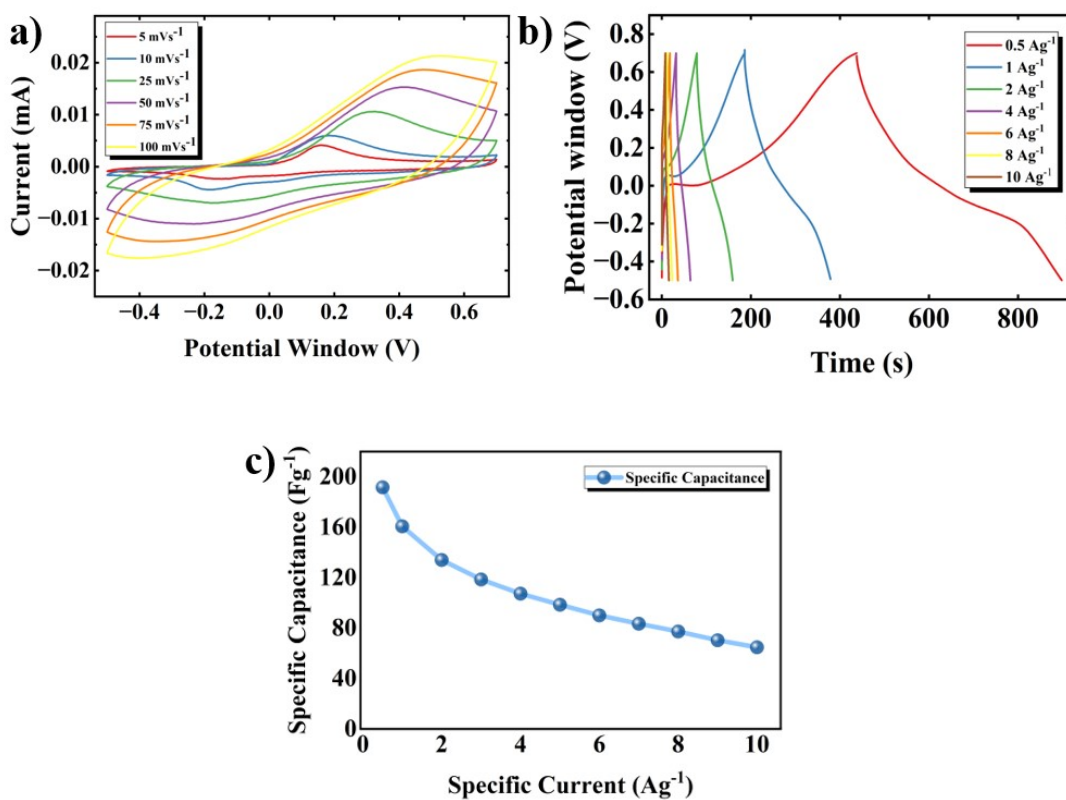

**Figure S3:** **a)** CV curves of  $\text{CaMnO}_3$  in  $1\text{M KOH}$  within the potential window of  $-0.5 - 0.7\text{ V}$  at different scan rates ( $5 - 100\text{ mVs}^{-1}$ ). **b)** GCD curves of  $\text{CaMnO}_3$  in  $1\text{M KOH}$  within the potential window of  $-0.5 - 0.7\text{ V}$ . **c)** Specific capacitance calculated from GCD in the potential window of  $-0.5 - 0.7\text{ V}$ .

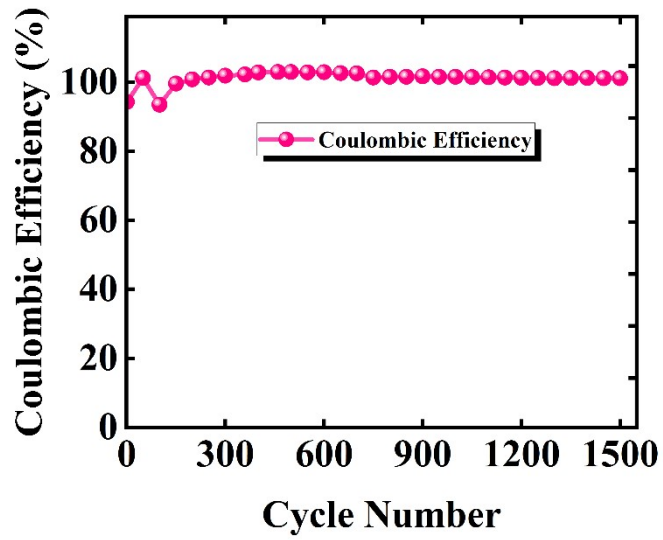

**Figure S4:** Coulombic efficiency of CaMnO<sub>3</sub> electrode material in 0.5M Ca(NO<sub>3</sub>)<sub>2</sub> electrolyte.

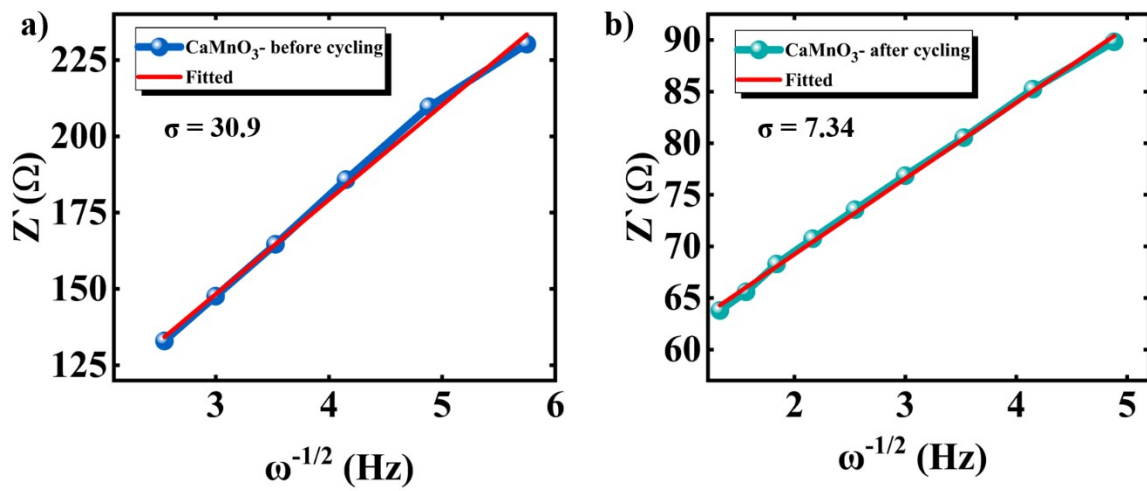

**Figure S5:** Plot of  $Z'$  vs  $\omega^{-1/2}$  of CaMnO<sub>3</sub> a) before cycling b) after cycling

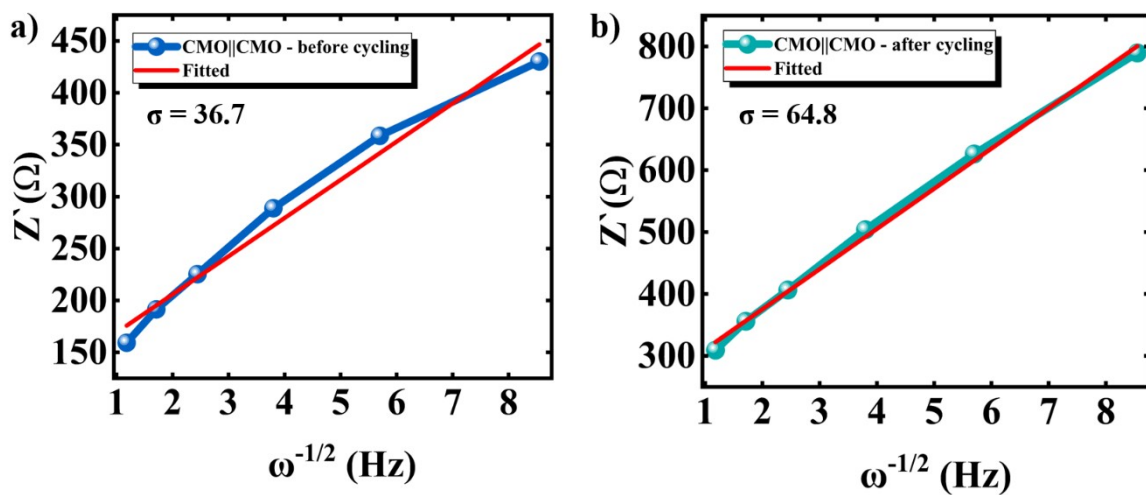

Figure S6: Plot of  $Z'$  vs  $\omega^{-1/2}$  of CMO||CMO Symmetric supercapacitor a) before cycling  
b) after cycling

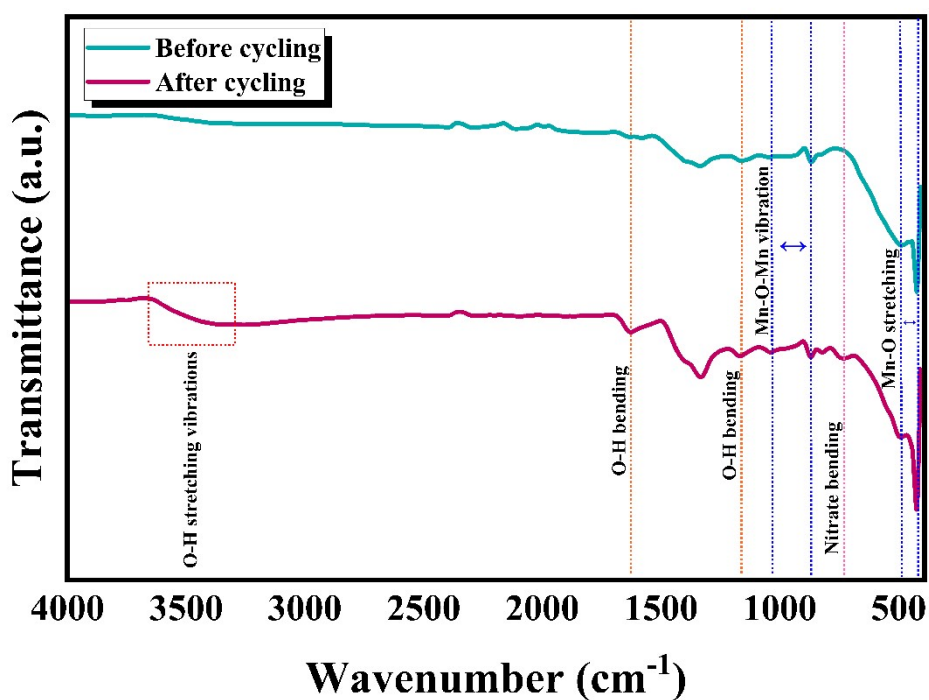

Figure S7: FTIR spectra of  $\text{CaMnO}_3$  electrode before and after electrochemical cycling in 0.5M  $\text{Ca}(\text{NO}_3)_2$  showing MnOOH formation.
